# Supplementary material for: Identification of 12 immune-related lncRNAs and molecular subtypes for the clear cell renal cell carcinoma based on RNA sequencing data
Source: PubMed Central journal article supplement (PMC7467926; doi:10.1038/s41598-020-71150-3), 2020-09-02
Supplement: 41598_2020_71150_MOESM1_ESM.pdf [file 41598_2020_71150_MOESM1_ESM.pdf]

**Identification of 12 immune-related lncRNAs and molecular subtypes for the clear cell renal cell carcinoma based on RNA sequencing data**

Weimin Zhong<sup>1#</sup>, Bin Chen<sup>4#</sup>, Hongbin Zhong<sup>1</sup>, Chaoqun Huang<sup>1</sup>, Jianqiong Lin<sup>1</sup>,  
Maoshu Zhu<sup>1</sup>, Miaoxuan Chen<sup>1</sup>, Ying Lin<sup>1</sup>, Yao Lin<sup>2\*</sup>, Jiyi Huang<sup>1,3\*</sup>

## Supplementary information

### Supplementary Figure 1

A logFC heatmap for each GEO datasets (GSE46699, GSE36895, GSE15642 and GSE53757), the red label represent up-regulated while the green label represent down-regulated.

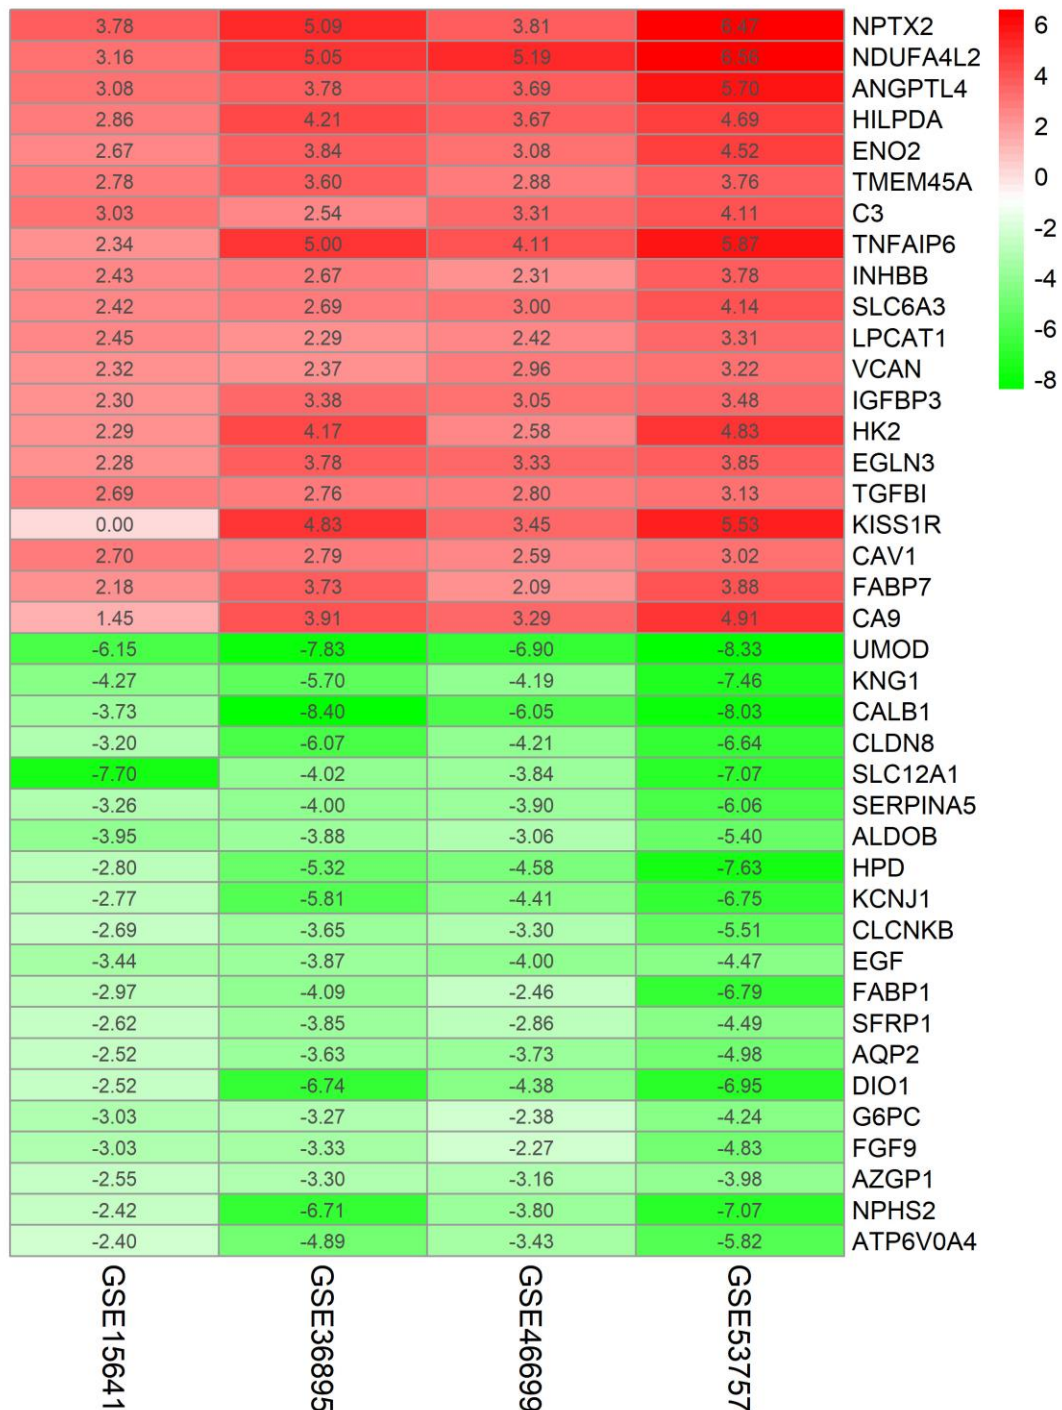

### Supplementary Figure 2

KM curve survival analysis for the risk groups in the ICGC dataset

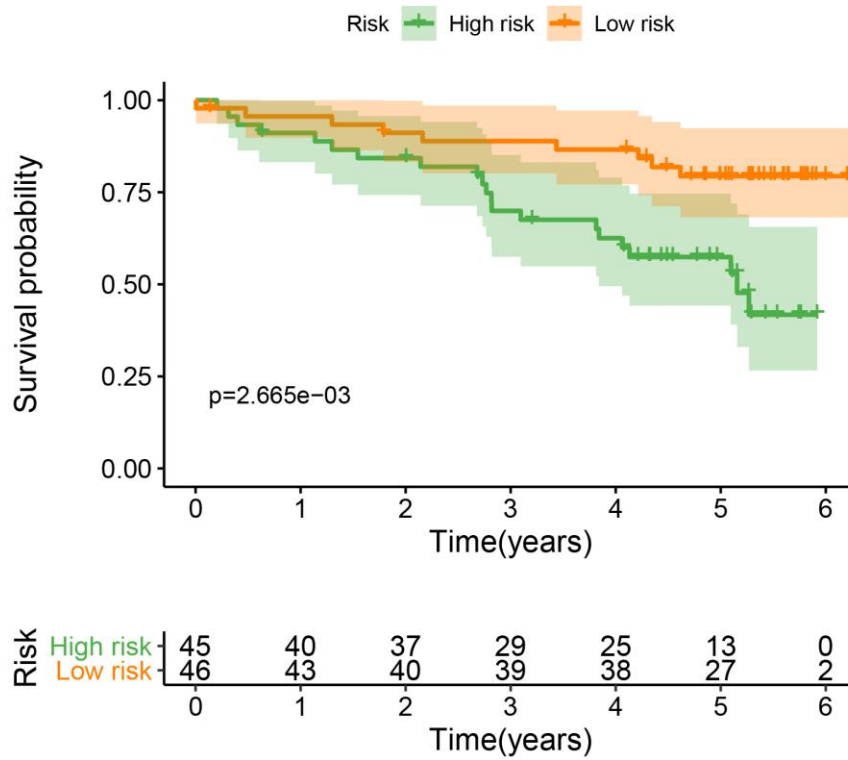

### Supplementary Figure 3

Time ROC curves analysis for the 12-lncRNA signature in the ICGC dataset

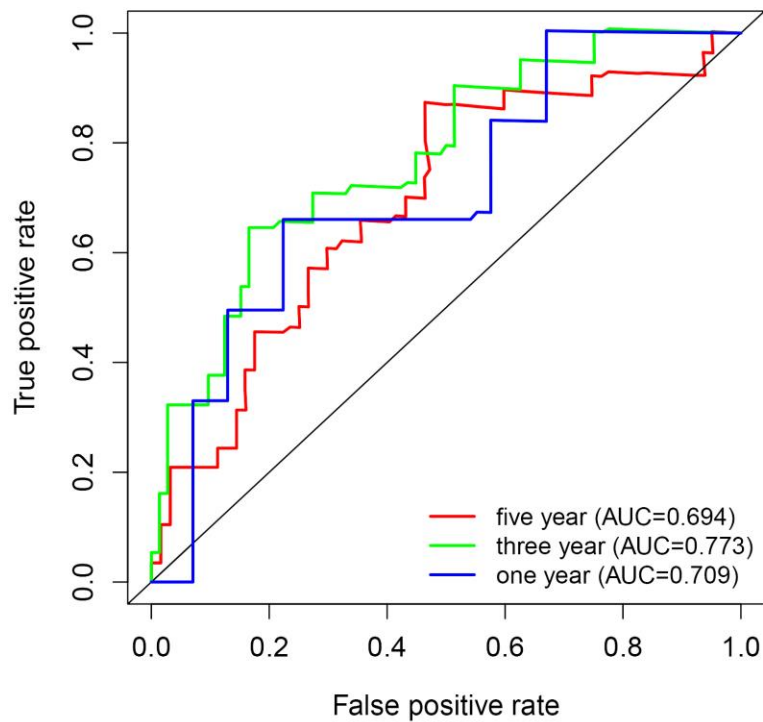

### Supplementary Figure 4

Roc curve analysis for the 12-lncRNA signature and clinical traits (Stage, Gender, Age, Grade, T, M, N and Smoking)

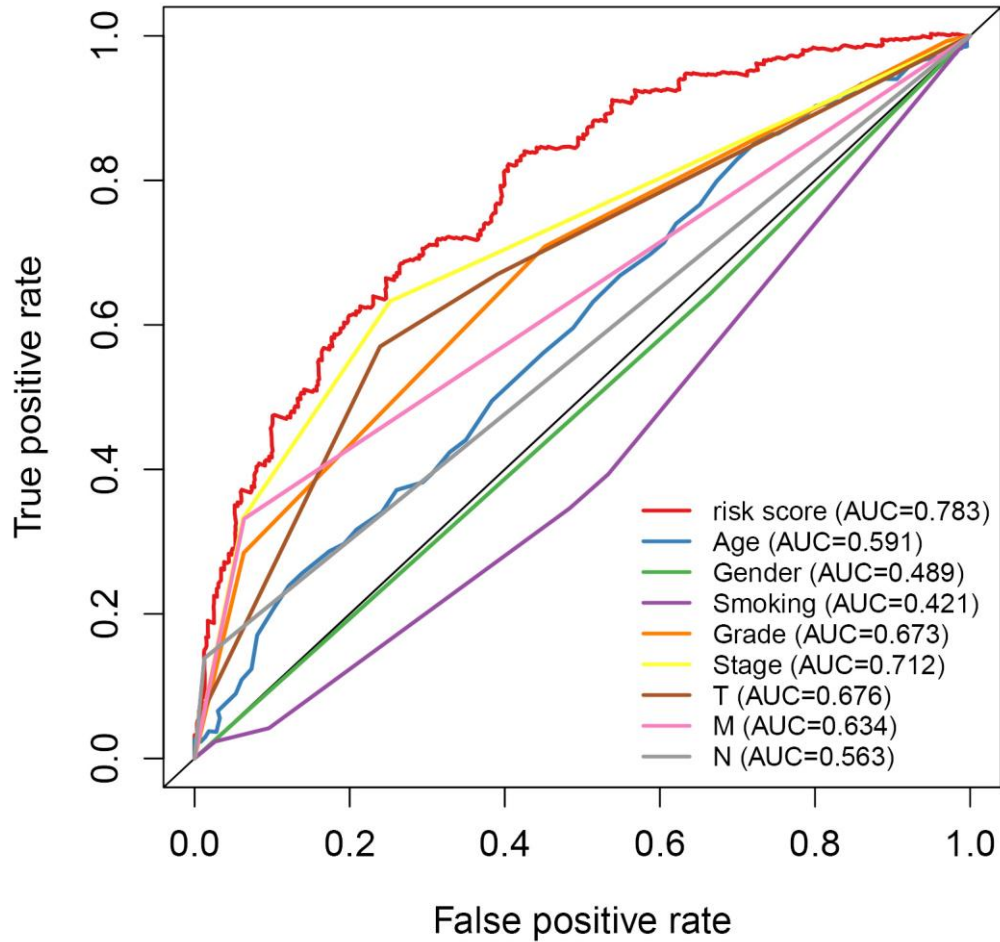

### Supplementary Figure 5

The association between 12 lncRNAs expression and clinical features. (A) Boxplots of 12 lncRNAs from AC005104.1 to SPINT1-AS1 in different pathological stages. (B) Botplots for 12 lncRNAs from AC005104.1 to SPINT1-AS1 in different grade. ns: no significant; \*P < 0.05; \*\*P < 0.01; \*\*\*P < 0.001.

**A**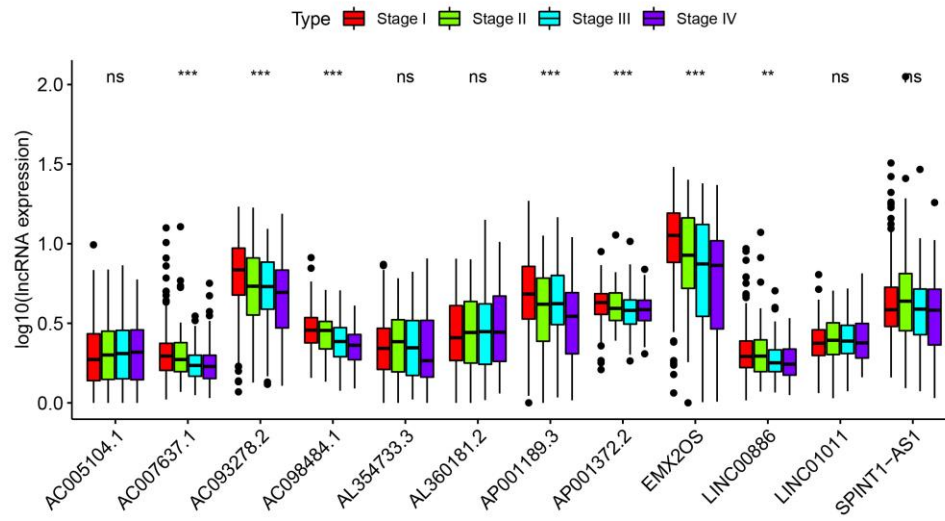**B**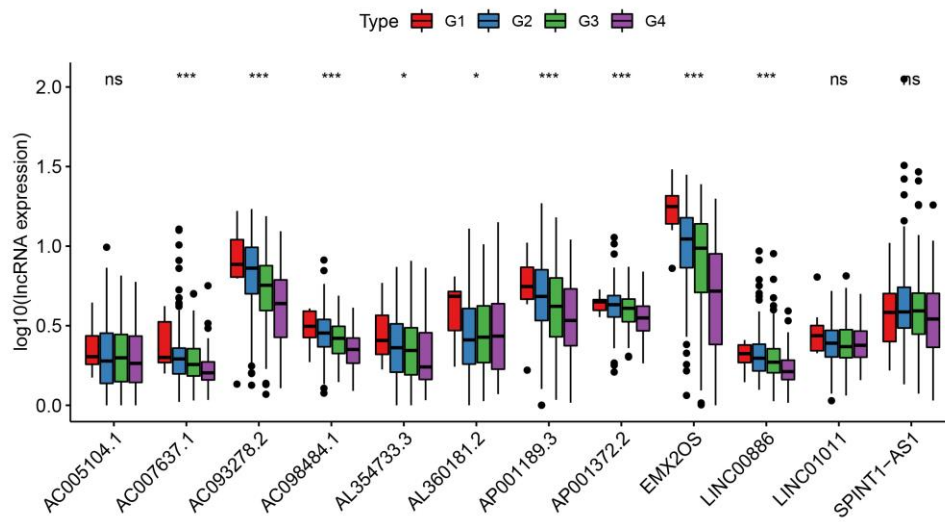

### Supplementary Figure 6

KM curves analysis for the overall survival of different subtypes in the ICGC dataset.

**Survival curve (p=0.051)**

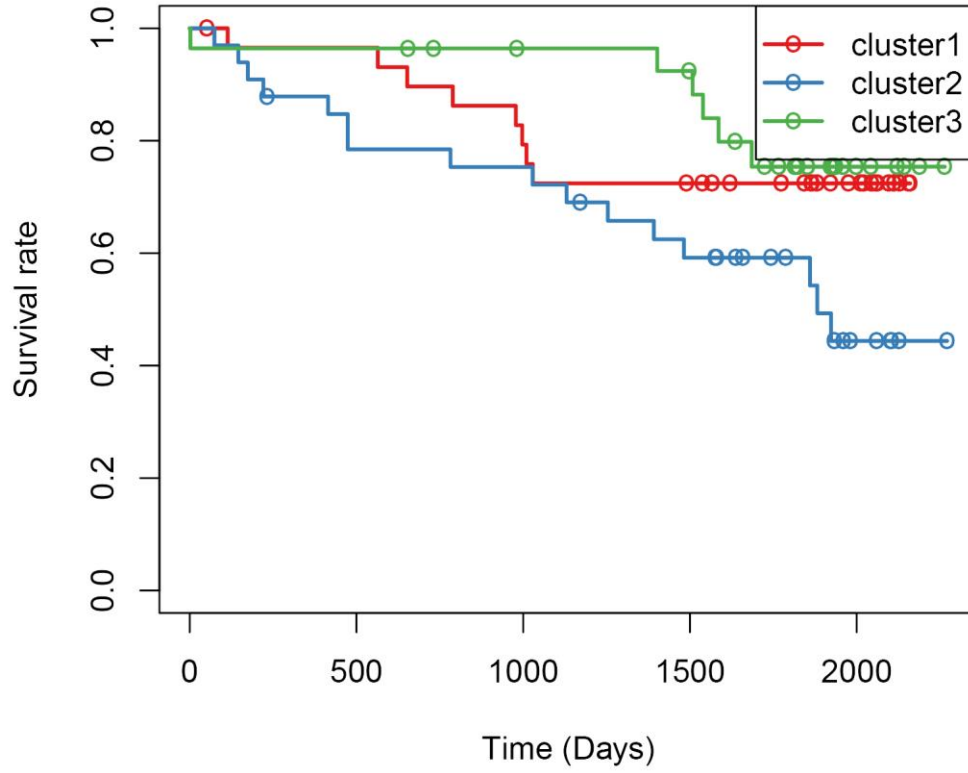

## Supplementary Figure 7

Estimation of the relationships between 12 lncRNAs and three subgroups

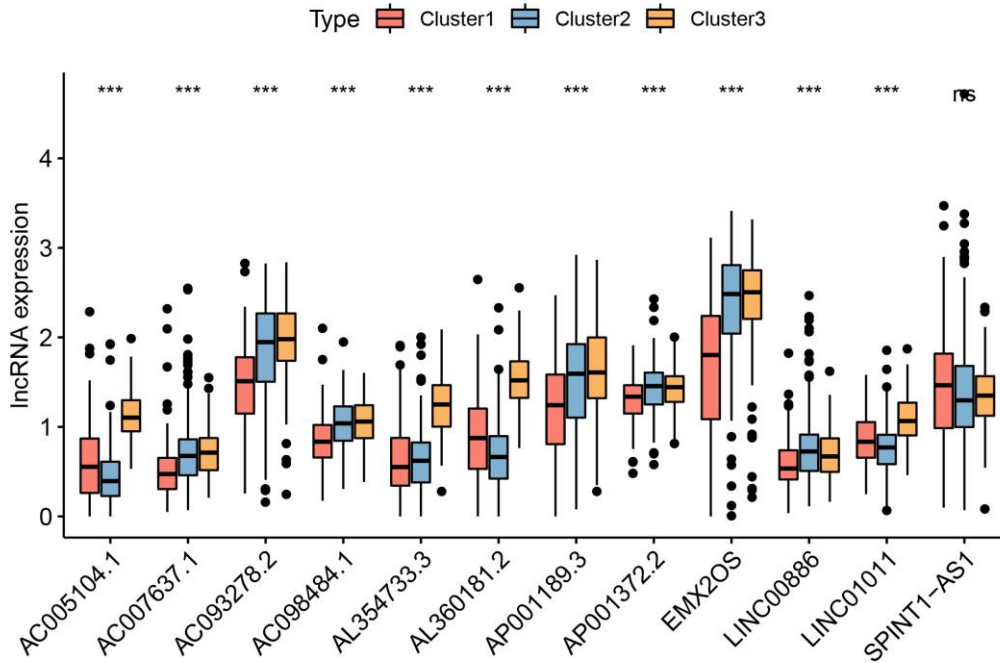

## Supplementary Table 1

326 DEGs information that identified by RRA analysis

| Name     | Pvalue   | adjPvalue | logFC     |
|----------|----------|-----------|-----------|
| NPTX2    | 1.47E-15 | 3.18E-11  | 4.7863709 |
| NDUFA4L2 | 2.65E-13 | 5.75E-09  | 4.9919465 |
| ANGPTL4  | 6.96E-13 | 1.51E-08  | 4.0622925 |
| HILPDA   | 2.36E-12 | 5.12E-08  | 3.8568892 |
| ENO2     | 1.90E-11 | 4.12E-07  | 3.5284086 |
| TMEM45A  | 2.72E-11 | 5.89E-07  | 3.255033  |
| C3       | 3.78E-11 | 8.19E-07  | 3.2484773 |
| TNFAIP6  | 4.24E-11 | 9.19E-07  | 4.3315033 |
| INHBB    | 8.11E-11 | 1.76E-06  | 2.79854   |
| SLC6A3   | 9.61E-11 | 2.08E-06  | 3.0634197 |
| LPCAT1   | 1.78E-10 | 3.86E-06  | 2.6174957 |
| VCAN     | 2.19E-10 | 4.76E-06  | 2.7164757 |
| IGFBP3   | 2.19E-10 | 4.76E-06  | 3.05388   |
| HK2      | 2.51E-10 | 5.44E-06  | 3.4673883 |
| EGLN3    | 2.68E-10 | 5.80E-06  | 3.3108516 |
| TGFBI    | 2.85E-10 | 6.18E-06  | 2.8444058 |
| KISS1R   | 3.39E-10 | 7.35E-06  | 3.4525328 |
| CAV1     | 4.87E-10 | 1.06E-05  | 2.7769282 |

---

|          |          |           |           |
|----------|----------|-----------|-----------|
| FABP7    | 4.87E-10 | 1.06E-05  | 2.9700474 |
| CA9      | 1.57E-09 | 3.40E-05  | 3.3905242 |
| NETO2    | 1.81E-09 | 3.93E-05  | 2.9325383 |
| CXCR4    | 2.85E-09 | 6.18E-05  | 2.5036095 |
| C1QA     | 4.14E-09 | 8.99E-05  | 2.2734821 |
| C1QB     | 5.50E-09 | 0.0001192 | 2.8466761 |
| BIRC3    | 5.50E-09 | 0.0001192 | 2.279771  |
| PLK2     | 5.50E-09 | 0.0001192 | 2.3617024 |
| FABP5    | 6.38E-09 | 0.0001383 | 2.5769971 |
| LYZ      | 8.01E-09 | 0.0001735 | 2.2242749 |
| LOX      | 8.23E-09 | 0.0001784 | 2.770614  |
| DDIT4    | 8.69E-09 | 0.0001884 | 2.1676884 |
| NOL3     | 1.05E-08 | 0.0002266 | 2.0848482 |
| APOC1    | 1.19E-08 | 0.0002573 | 2.4643647 |
| AHNAK2   | 1.31E-08 | 0.000284  | 2.2726854 |
| CP       | 1.45E-08 | 0.0003151 | 3.1804336 |
| RGS1     | 1.48E-08 | 0.0003202 | 2.4821054 |
| COL23A1  | 1.67E-08 | 0.0003622 | 2.6559239 |
| CCL5     | 1.99E-08 | 0.0004308 | 2.0112918 |
| CTHRC1   | 2.17E-08 | 0.0004702 | 2.5537755 |
| BHLHE41  | 2.21E-08 | 0.0004801 | 2.828556  |
| GZMA     | 2.57E-08 | 0.0005561 | 1.9674084 |
| VWF      | 2.84E-08 | 0.0006157 | 2.3180794 |
| ZNF395   | 2.90E-08 | 0.0006281 | 1.9513641 |
| SPAG4    | 3.08E-08 | 0.0006667 | 2.8560118 |
| TYROBP   | 3.20E-08 | 0.0006934 | 2.3634499 |
| CYP2J2   | 3.20E-08 | 0.0006934 | 2.4626315 |
| CCND1    | 3.39E-08 | 0.0007348 | 2.0313847 |
| STC2     | 3.39E-08 | 0.0007348 | 1.8960054 |
| LAPTM5   | 3.59E-08 | 0.0007782 | 2.151237  |
| C10orf10 | 3.66E-08 | 0.000793  | 1.9924676 |
| ADM      | 4.09E-08 | 0.0008867 | 1.9548955 |
| PLOD2    | 4.17E-08 | 0.0009031 | 2.2480821 |
| OLFML2B  | 4.98E-08 | 0.0010797 | 1.8649286 |
| SCARB1   | 5.62E-08 | 0.0012178 | 1.9244853 |
| PSMB9    | 6.42E-08 | 0.0013916 | 2.1166646 |
| TLR3     | 8.02E-08 | 0.0017395 | 1.7345806 |
| GAL3ST1  | 8.02E-08 | 0.0017395 | 1.9932018 |
| CAV2     | 8.28E-08 | 0.0017941 | 1.8230404 |
| LGALS1   | 9.62E-08 | 0.0020864 | 2.0593966 |
| ITGB2    | 1.05E-07 | 0.0022781 | 1.8625685 |
| DDB2     | 1.10E-07 | 0.0023788 | 1.8376203 |
| DIRAS2   | 1.26E-07 | 0.0027386 | 2.5417737 |
| BTN3A2   | 1.28E-07 | 0.0027767 | 1.7420793 |

---



---

|         |          |           |           |
|---------|----------|-----------|-----------|
| CD163   | 1.30E-07 | 0.0028152 | 1.7298787 |
| CSTA    | 1.43E-07 | 0.003096  | 2.0815353 |
| TAP1    | 1.63E-07 | 0.003533  | 1.8190601 |
| EVI2A   | 1.67E-07 | 0.0036257 | 1.798937  |
| NKG7    | 1.74E-07 | 0.0037681 | 2.2841049 |
| APOLD1  | 1.81E-07 | 0.0039146 | 1.9802688 |
| TIMP1   | 1.85E-07 | 0.0040147 | 1.9175166 |
| ANGPT2  | 1.85E-07 | 0.0040147 | 2.5214989 |
| VEGFA   | 1.92E-07 | 0.0041683 | 1.8761981 |
| SCD     | 1.97E-07 | 0.0042732 | 1.6654676 |
| GPR65   | 2.15E-07 | 0.0046558 | 1.9243817 |
| CCL20   | 2.15E-07 | 0.0046558 | 2.1890913 |
| CCL18   | 2.23E-07 | 0.0048275 | 1.9241498 |
| KCNE4   | 2.57E-07 | 0.0055618 | 2.1913205 |
| IL10RA  | 2.81E-07 | 0.0060959 | 1.6457563 |
| SAP30   | 2.84E-07 | 0.0061653 | 1.5678086 |
| MCAM    | 2.88E-07 | 0.0062353 | 1.8886028 |
| PLA2G7  | 2.91E-07 | 0.0063058 | 1.9797028 |
| ERV3-2  | 2.97E-07 | 0.0064487 | 1.7474621 |
| FCGR1B  | 3.39E-07 | 0.0073578 | 1.8572043 |
| HCLS1   | 3.43E-07 | 0.0074377 | 1.9091474 |
| ACKR3   | 3.62E-07 | 0.0078468 | 1.8591226 |
| GJA1    | 3.74E-07 | 0.0081003 | 1.7909806 |
| CORO1A  | 3.74E-07 | 0.0081003 | 1.7692655 |
| LY96    | 3.90E-07 | 0.0084477 | 1.8968525 |
| FAM57A  | 3.94E-07 | 0.0085363 | 1.6928494 |
| HEY1    | 4.10E-07 | 0.0088975 | 1.623948  |
| PSMB8   | 4.28E-07 | 0.0092701 | 1.6735749 |
| FCER1G  | 4.87E-07 | 0.0105624 | 1.9565    |
| PRKCDBP | 4.97E-07 | 0.0107726 | 1.7288102 |
| IFI16   | 5.07E-07 | 0.0109859 | 1.8654652 |
| C1S     | 5.58E-07 | 0.0121004 | 1.5066805 |
| RNASE6  | 6.31E-07 | 0.0136734 | 1.652508  |
| LHFPL2  | 6.73E-07 | 0.0145814 | 1.5305985 |
| ELTD1   | 7.04E-07 | 0.0152572 | 1.587028  |
| KCNK3   | 7.17E-07 | 0.0155339 | 1.5182363 |
| FLT1    | 7.43E-07 | 0.0160988 | 1.4132457 |
| TYMP    | 7.49E-07 | 0.0162423 | 1.6049008 |
| RNASET2 | 7.90E-07 | 0.0171241 | 2.0379566 |
| PNMA2   | 7.90E-07 | 0.0171241 | 1.6531169 |
| ENPP3   | 8.63E-07 | 0.0187176 | 2.1397101 |
| COL21A1 | 9.06E-07 | 0.0196511 | 1.6056756 |
| MTCL1   | 9.14E-07 | 0.0198178 | 1.6452301 |
| RRAD    | 9.22E-07 | 0.0199856 | 1.4394357 |

---

---

|          |          |           |           |
|----------|----------|-----------|-----------|
| PTPRC    | 9.30E-07 | 0.0201544 | 1.4629682 |
| SERPINE1 | 9.30E-07 | 0.0201544 | 1.4269578 |
| PPP1R3C  | 9.30E-07 | 0.0201544 | 1.677792  |
| FN1      | 9.77E-07 | 0.02119   | 1.7793841 |
| CLEC2B   | 1.01E-06 | 0.0219022 | 1.5317692 |
| EHD2     | 1.04E-06 | 0.022448  | 1.7242947 |
| PCDH17   | 1.07E-06 | 0.0231916 | 1.6124668 |
| VIM      | 1.10E-06 | 0.0237612 | 1.6384554 |
| TRIB3    | 1.11E-06 | 0.0241468 | 1.8808469 |
| KCNJ2    | 1.23E-06 | 0.0265597 | 1.7366367 |
| CD70     | 1.28E-06 | 0.0278318 | 2.0567245 |
| APOL1    | 1.30E-06 | 0.0282658 | 1.625524  |
| RARRES2  | 1.39E-06 | 0.0300528 | 1.3879668 |
| PYCARD   | 1.40E-06 | 0.030282  | 1.5895982 |
| MS4A4A   | 1.42E-06 | 0.0307443 | 1.470912  |
| DOC2A    | 1.45E-06 | 0.0314477 | 1.9833602 |
| CHST15   | 1.46E-06 | 0.0316848 | 1.4663128 |
| CXCL9    | 1.46E-06 | 0.0316848 | 1.7894825 |
| COL6A2   | 1.53E-06 | 0.0331358 | 1.374133  |
| ARL4C    | 1.54E-06 | 0.0333824 | 1.4111872 |
| GZMB     | 1.60E-06 | 0.034636  | 1.9062136 |
| LIPA     | 1.60E-06 | 0.034636  | 1.3966345 |
| HCK      | 1.63E-06 | 0.035405  | 1.5470738 |
| ITGA5    | 1.65E-06 | 0.0356641 | 1.5065179 |
| TMCC1    | 1.69E-06 | 0.0367149 | 1.351145  |
| ISG20    | 1.77E-06 | 0.0383345 | 1.6383164 |
| ST8SIA4  | 1.78E-06 | 0.0386095 | 2.0824638 |
| SERPINH1 | 1.82E-06 | 0.0394435 | 1.2929034 |
| PRC1     | 1.93E-06 | 0.0417337 | 1.5385943 |
| HLX      | 1.99E-06 | 0.0432148 | 1.4210671 |
| COL1A2   | 2.04E-06 | 0.0441221 | 1.5866644 |
| PECAM1   | 2.08E-06 | 0.0450437 | 1.3548869 |
| ALOX5    | 2.09E-06 | 0.0453541 | 1.3737956 |
| THEMIS2  | 2.12E-06 | 0.0459797 | 1.4483692 |
| SLC2A3   | 2.21E-06 | 0.0478952 | 1.6811192 |
| GMFG     | 2.25E-06 | 0.0488751 | 1.3596574 |
| CD36     | 2.29E-06 | 0.0495367 | 1.7969086 |
| SCG5     | 2.30E-06 | 0.04987   | 1.7758852 |
| HLA-DMA  | 2.30E-06 | 0.04987   | 1.5056682 |
| UMOD     | 2.90E-16 | 6.28E-12  | -7.302804 |
| KNG1     | 7.42E-14 | 1.61E-09  | -5.404098 |
| CALB1    | 3.76E-13 | 8.14E-09  | -6.554177 |
| CLDN8    | 2.15E-11 | 4.66E-07  | -5.030439 |
| SLC12A1  | 5.64E-11 | 1.22E-06  | -5.658348 |

---

---

|          |          |           |           |
|----------|----------|-----------|-----------|
| SERPINA5 | 6.19E-11 | 1.34E-06  | -4.30207  |
| ALDOB    | 8.84E-11 | 1.92E-06  | -4.070806 |
| HPD      | 1.66E-10 | 3.59E-06  | -5.082931 |
| KCNJ1    | 2.19E-10 | 4.76E-06  | -4.935449 |
| CLCNKB   | 2.68E-10 | 5.80E-06  | -3.786769 |
| EGF      | 3.65E-10 | 7.91E-06  | -3.942262 |
| FABP1    | 4.10E-10 | 8.90E-06  | -4.07696  |
| SFRP1    | 4.10E-10 | 8.90E-06  | -3.456481 |
| AQP2     | 7.05E-10 | 1.53E-05  | -3.717898 |
| DIO1     | 8.04E-10 | 1.74E-05  | -5.144958 |
| G6PC     | 9.45E-10 | 2.05E-05  | -3.230212 |
| FGF9     | 1.04E-09 | 2.25E-05  | -3.362799 |
| AZGP1    | 1.24E-09 | 2.69E-05  | -3.247542 |
| NPHS2    | 1.24E-09 | 2.69E-05  | -4.998929 |
| ATP6V0A4 | 1.41E-09 | 3.07E-05  | -4.135511 |
| TYRP1    | 1.48E-09 | 3.20E-05  | -3.740351 |
| SLC22A6  | 1.60E-09 | 3.48E-05  | -3.507035 |
| XPNPEP2  | 1.81E-09 | 3.93E-05  | -4.047793 |
| ALB      | 1.88E-09 | 4.09E-05  | -3.460995 |
| PCP4     | 1.96E-09 | 4.25E-05  | -3.330601 |
| HRG      | 2.04E-09 | 4.42E-05  | -3.310422 |
| DPEP1    | 2.12E-09 | 4.59E-05  | -3.760058 |
| PCK1     | 2.29E-09 | 4.96E-05  | -3.756705 |
| MAL      | 2.56E-09 | 5.54E-05  | -3.692542 |
| TSPAN8   | 2.85E-09 | 6.18E-05  | -3.562915 |
| ACSF2    | 3.76E-09 | 8.14E-05  | -3.191834 |
| TMEM213  | 4.31E-09 | 9.34E-05  | -3.920067 |
| HSD11B2  | 4.42E-09 | 9.58E-05  | -3.581927 |
| SOSTDC1  | 4.56E-09 | 9.90E-05  | -3.21646  |
| CYP4F3   | 4.71E-09 | 0.0001021 | -3.428473 |
| S100A2   | 5.33E-09 | 0.0001156 | -3.495117 |
| HAO2     | 5.50E-09 | 0.0001192 | -2.910431 |
| ABAT     | 6.20E-09 | 0.0001343 | -2.887205 |
| SLC12A3  | 7.16E-09 | 0.0001552 | -3.254631 |
| SLC13A1  | 7.79E-09 | 0.0001688 | -3.152569 |
| FXYP4    | 9.15E-09 | 0.0001984 | -3.903004 |
| DUSP9    | 1.16E-08 | 0.0002509 | -2.894959 |
| ALDH6A1  | 1.41E-08 | 0.0003054 | -2.885324 |
| SLC13A3  | 1.44E-08 | 0.0003127 | -3.054985 |
| DEFB1    | 1.58E-08 | 0.0003436 | -3.405082 |
| ASS1     | 1.90E-08 | 0.0004121 | -2.758804 |
| ESRRG    | 2.21E-08 | 0.0004801 | -2.926568 |
| TFAP2B   | 2.26E-08 | 0.0004904 | -2.674896 |
| TMEM52B  | 2.45E-08 | 0.0005315 | -3.947865 |

---

---

|           |          |           |           |
|-----------|----------|-----------|-----------|
| DDC       | 2.51E-08 | 0.0005447 | -2.414098 |
| CYP4A11   | 2.57E-08 | 0.0005561 | -2.513541 |
| TUBB2B    | 3.08E-08 | 0.0006667 | -2.530529 |
| TCF21     | 3.14E-08 | 0.0006799 | -2.496969 |
| OGDHL     | 3.32E-08 | 0.0007208 | -2.846837 |
| AFM       | 4.24E-08 | 0.0009182 | -3.60049  |
| C7        | 4.72E-08 | 0.0010242 | -2.750164 |
| DCXR      | 4.98E-08 | 0.0010797 | -2.585558 |
| PLG       | 4.98E-08 | 0.0010797 | -3.084024 |
| PTH1R     | 5.25E-08 | 0.0011374 | -2.973055 |
| FAM151A   | 5.64E-08 | 0.001222  | -3.310906 |
| EFHD1     | 6.01E-08 | 0.0013025 | -2.640471 |
| SLC22A8   | 6.16E-08 | 0.0013365 | -4.189292 |
| LRRC19    | 6.42E-08 | 0.0013916 | -2.532659 |
| GLYAT     | 6.63E-08 | 0.0014377 | -2.245246 |
| FBP1      | 7.07E-08 | 0.0015336 | -2.527832 |
| PVALB     | 7.78E-08 | 0.0016862 | -3.421883 |
| PPP1R1A   | 9.48E-08 | 0.0020557 | -2.412781 |
| ATP6V1B1  | 9.77E-08 | 0.0021175 | -2.401014 |
| TOX3      | 9.91E-08 | 0.0021489 | -2.266402 |
| PCK2      | 1.23E-07 | 0.0026636 | -2.338826 |
| SCNN1G    | 1.59E-07 | 0.0034421 | -2.743564 |
| ALDH4A1   | 1.63E-07 | 0.003533  | -2.364461 |
| SORD      | 1.85E-07 | 0.0040147 | -1.985296 |
| IL17RB    | 1.88E-07 | 0.0040654 | -2.02656  |
| SLC34A1   | 1.90E-07 | 0.0041166 | -2.611352 |
| FTCD      | 1.97E-07 | 0.0042732 | -1.89992  |
| SLC5A12   | 1.97E-07 | 0.0042732 | -2.366611 |
| SLC7A9    | 2.00E-07 | 0.0043264 | -2.008003 |
| MT1F      | 2.07E-07 | 0.0044888 | -2.189513 |
| SLC27A2   | 2.07E-07 | 0.0044888 | -2.08448  |
| PEPD      | 2.28E-07 | 0.0049445 | -2.03111  |
| ATP6V1G3  | 2.33E-07 | 0.0050591 | -3.239567 |
| RALYL     | 2.47E-07 | 0.0053507 | -3.660475 |
| ACPP      | 2.51E-07 | 0.005434  | -2.995437 |
| CLIC5     | 2.51E-07 | 0.005434  | -2.166733 |
| AGMAT     | 2.57E-07 | 0.0055618 | -2.172175 |
| SOST      | 2.61E-07 | 0.0056533 | -3.099937 |
| LINC00645 | 2.75E-07 | 0.0059671 | -3.193299 |
| PLCL1     | 2.78E-07 | 0.0060272 | -2.319684 |
| MME       | 2.78E-07 | 0.0060272 | -2.086422 |
| CYP17A1   | 2.88E-07 | 0.0062353 | -2.238106 |
| SLC47A2   | 3.06E-07 | 0.0066291 | -2.8782   |
| FMO1      | 3.32E-07 | 0.0072    | -2.055695 |

---

---

|          |          |           |           |
|----------|----------|-----------|-----------|
| FAM169A  | 3.43E-07 | 0.0074377 | -2.197552 |
| PRODH2   | 3.43E-07 | 0.0074377 | -2.270279 |
| LPPR1    | 3.47E-07 | 0.0075182 | -2.772715 |
| DPYS     | 3.54E-07 | 0.0076812 | -2.167162 |
| UPP2     | 3.56E-07 | 0.0077111 | -2.794842 |
| AOX1     | 3.78E-07 | 0.0081861 | -1.885688 |
| GSTM3    | 3.98E-07 | 0.0086255 | -2.163723 |
| GATA3    | 3.98E-07 | 0.0086255 | -2.330078 |
| CTXN3    | 4.11E-07 | 0.0089047 | -3.200629 |
| PIPOX    | 4.15E-07 | 0.0089896 | -2.78988  |
| DCN      | 4.23E-07 | 0.0091759 | -1.966154 |
| KL       | 4.59E-07 | 0.0099502 | -2.187749 |
| CHL1     | 4.68E-07 | 0.0101513 | -2.12606  |
| CORO2B   | 5.17E-07 | 0.0112024 | -1.781482 |
| TMPRSS2  | 5.32E-07 | 0.011533  | -2.242153 |
| EPCAM    | 5.64E-07 | 0.0122163 | -2.471577 |
| CDH16    | 5.74E-07 | 0.0124507 | -2.207442 |
| CWH43    | 5.74E-07 | 0.0124507 | -2.263498 |
| KLK1     | 5.80E-07 | 0.0125691 | -1.9413   |
| MT1H     | 6.19E-07 | 0.013422  | -2.070257 |
| GGT6     | 6.35E-07 | 0.0137602 | -2.706129 |
| BHMT     | 6.66E-07 | 0.014449  | -1.994456 |
| MPPED2   | 6.85E-07 | 0.014849  | -1.847225 |
| HSPA2    | 7.10E-07 | 0.0153951 | -2.19101  |
| HS6ST2   | 7.15E-07 | 0.0155008 | -2.950906 |
| CAPN3    | 7.17E-07 | 0.0155339 | -1.878915 |
| HADH     | 7.23E-07 | 0.0156737 | -1.913352 |
| KCNJ15   | 7.36E-07 | 0.0159561 | -1.960405 |
| DAO      | 7.36E-07 | 0.0159561 | -2.496216 |
| MT1G     | 7.49E-07 | 0.0162423 | -2.068359 |
| GRB14    | 7.63E-07 | 0.0165324 | -2.122586 |
| SLC4A1   | 7.69E-07 | 0.0166788 | -2.34437  |
| HEPACAM2 | 7.72E-07 | 0.0167392 | -3.24158  |
| SLC44A4  | 8.04E-07 | 0.0174258 | -1.810502 |
| HMGCS2   | 8.39E-07 | 0.0181976 | -1.951932 |
| ANK2     | 8.61E-07 | 0.0186728 | -1.772605 |
| ERBB4    | 9.14E-07 | 0.0198178 | -1.938282 |
| FGF1     | 9.45E-07 | 0.0204953 | -2.779317 |
| ALDH8A1  | 9.61E-07 | 0.0208405 | -2.166629 |
| GPC5     | 9.62E-07 | 0.0208458 | -3.226437 |
| SCNN1A   | 9.94E-07 | 0.0215439 | -2.229127 |
| GK       | 1.01E-06 | 0.0219022 | -1.575015 |
| HYAL1    | 1.02E-06 | 0.022083  | -1.568686 |
| ATP6V0D2 | 1.03E-06 | 0.0223506 | -2.771273 |

---

---

|               |          |           |           |
|---------------|----------|-----------|-----------|
| CYP24A1       | 1.04E-06 | 0.022448  | -1.794136 |
| NOX4          | 1.04E-06 | 0.0226322 | -1.82919  |
| CTH           | 1.06E-06 | 0.023004  | -1.514472 |
| MIOX          | 1.07E-06 | 0.0231295 | -2.574922 |
| CLDN10        | 1.08E-06 | 0.0233803 | -1.809871 |
| ARG2          | 1.10E-06 | 0.0239534 | -1.880238 |
| MST1L         | 1.11E-06 | 0.0241468 | -1.840206 |
| BPHL          | 1.12E-06 | 0.0243413 | -1.70901  |
| AKR7A3        | 1.13E-06 | 0.024537  | -1.606421 |
| MTTP          | 1.14E-06 | 0.0247339 | -2.495126 |
| MUC15         | 1.14E-06 | 0.0247409 | -2.973386 |
| AP1M2         | 1.16E-06 | 0.0251313 | -1.695384 |
| CYP4F2        | 1.18E-06 | 0.0255739 | -3.209358 |
| RGN           | 1.21E-06 | 0.0261455 | -1.651565 |
| NAP1L2        | 1.23E-06 | 0.0267686 | -2.166378 |
| ACOX2         | 1.23E-06 | 0.0267686 | -1.953158 |
| PDE1A         | 1.27E-06 | 0.0276167 | -1.808258 |
| EPHX2         | 1.30E-06 | 0.0282658 | -1.689277 |
| RBP4          | 1.30E-06 | 0.0282658 | -1.806513 |
| RP11-999E24.3 | 1.34E-06 | 0.0290926 | -2.873693 |
| RHCG          | 1.38E-06 | 0.03002   | -3.038727 |
| CRYAA         | 1.38E-06 | 0.03002   | -3.063907 |
| ACAA1         | 1.40E-06 | 0.030282  | -1.762274 |
| GPD1L         | 1.51E-06 | 0.0326467 | -1.655589 |
| CRYM          | 1.52E-06 | 0.0328906 | -1.46971  |
| RNF212B       | 1.56E-06 | 0.0339263 | -2.604098 |
| FOLR1         | 1.57E-06 | 0.0341304 | -1.666048 |
| TST           | 1.62E-06 | 0.0351473 | -1.623348 |
| AOC1          | 1.63E-06 | 0.035405  | -1.717878 |
| ABCB1         | 1.63E-06 | 0.035405  | -1.779083 |
| SELENBP1      | 1.74E-06 | 0.0377888 | -1.525566 |
| OLFM4         | 1.81E-06 | 0.0392671 | -2.680395 |
| PBLD          | 1.90E-06 | 0.041152  | -1.906001 |
| IGFBP2        | 1.90E-06 | 0.041152  | -1.875242 |
| SLC17A1       | 1.91E-06 | 0.0414421 | -1.600745 |
| ENPP6         | 1.92E-06 | 0.0415511 | -3.150511 |
| MT1E          | 1.97E-06 | 0.0426177 | -1.763841 |
| MT1X          | 2.05E-06 | 0.0444277 | -1.662576 |
| CRHBP         | 2.08E-06 | 0.0451402 | -2.595646 |
| RAB25         | 2.14E-06 | 0.0463809 | -2.729915 |
| ELF5          | 2.16E-06 | 0.0469301 | -1.958689 |
| DMRT2         | 2.20E-06 | 0.0476441 | -2.454041 |
| SLC7A13       | 2.26E-06 | 0.0489301 | -3.273216 |
| MAN1C1        | 2.27E-06 | 0.0492051 | -2.063707 |

---

## Supplementary Table 2

Correlation analysis for the immune related lncRNAs.

| Immune Gene | lncRNA      | cor         | pvalue    | Regulation |
|-------------|-------------|-------------|-----------|------------|
| VEGFA       | AL022328.1  | 0.540812527 | 2.86E-42  | postive    |
| TYMP        | LINC01871   | 0.508138488 | 9.99E-37  | postive    |
| ISG20       | LINC01871   | 0.567796453 | 2.50E-47  | postive    |
| CCL5        | LINC01871   | 0.625785141 | 6.20E-60  | postive    |
| GZMB        | LINC01871   | 0.558556219 | 1.52E-45  | postive    |
| FCER1G      | LINC01871   | 0.514758382 | 8.41E-38  | postive    |
| VEGFA       | AL662844.4  | 0.559137724 | 1.18E-45  | postive    |
| FGF9        | AC104958.2  | 0.718882773 | 7.40E-87  | postive    |
| DEFB1       | AC104958.2  | 0.509906312 | 5.19E-37  | postive    |
| FGF9        | LINC01187   | 0.864982495 | 6.10E-163 | postive    |
| DEFB1       | LINC01187   | 0.55521758  | 6.52E-45  | postive    |
| EGF         | LINC01187   | 0.574224284 | 1.33E-48  | postive    |
| IL10RA      | MIR155HG    | 0.534038466 | 4.53E-41  | postive    |
| CCL5        | MIR155HG    | 0.6300528   | 5.73E-61  | postive    |
| FGF9        | LINC01802   | 0.54634272  | 2.87E-43  | postive    |
| DEFB1       | LINC01802   | 0.675600914 | 4.18E-73  | postive    |
| EGF         | LINC01802   | 0.645974874 | 5.63E-65  | postive    |
| S100A2      | HSD11B1-AS1 | 0.625938198 | 5.70E-60  | postive    |
| VEGFA       | LINC00342   | 0.538603622 | 7.10E-42  | postive    |
| FGF9        | HOXB-AS3    | 0.611727133 | 1.23E-56  | postive    |
| DEFB1       | HOXB-AS3    | 0.761029298 | 5.35E-103 | postive    |
| FGF9        | GATA2-AS1   | 0.61499606  | 2.18E-57  | postive    |
| DEFB1       | GATA2-AS1   | 0.591568839 | 3.46E-52  | postive    |
| EGF         | GATA2-AS1   | 0.540709987 | 2.99E-42  | postive    |
| FCER1G      | AC098613.1  | 0.529475426 | 2.81E-40  | postive    |
| FLT1        | AP001189.3  | 0.504994532 | 3.18E-36  | postive    |
| FGF9        | AC007996.1  | 0.562322624 | 2.90E-46  | postive    |
| ITGB2       | LINC01150   | 0.558921008 | 1.30E-45  | postive    |
| IL10RA      | LINC01150   | 0.54321618  | 1.06E-42  | postive    |
| HCK         | LINC01150   | 0.571305835 | 5.08E-48  | postive    |
| FCER1G      | LINC01150   | 0.509767654 | 5.46E-37  | postive    |
| DEFB1       | AC073896.2  | 0.60635435  | 2.03E-55  | postive    |
| FGF9        | AC006547.1  | 0.542860526 | 1.23E-42  | postive    |
| VEGFA       | AL928654.2  | 0.595133597 | 5.96E-53  | postive    |
| PSMB8       | HCP5        | 0.565991586 | 5.64E-47  | postive    |
| HLA-DMA     | HCP5        | 0.515694787 | 5.90E-38  | postive    |
| TAP1        | HCP5        | 0.695368147 | 4.41E-79  | postive    |
| PTPRC       | HCP5        | 0.500268625 | 1.77E-35  | postive    |
| C3          | AC008760.2  | 0.540295727 | 3.54E-42  | postive    |
| DEFB1       | LMO7-AS1    | 0.624484327 | 1.27E-59  | postive    |

|         |             |             |           |         |
|---------|-------------|-------------|-----------|---------|
| VEGFA   | AL109811.2  | 0.53041949  | 1.93E-40  | postive |
| VEGFA   | AC138028.4  | 0.540369527 | 3.44E-42  | postive |
| IL10RA  | AC138207.5  | 0.584972121 | 8.47E-51  | postive |
| DEFB1   | ZNF503-AS2  | 0.564981395 | 8.87E-47  | postive |
| EGF     | LINC00645   | 0.528367494 | 4.36E-40  | postive |
| ESRRG   | LINC00645   | 0.588762525 | 1.36E-51  | postive |
| GMFG    | CYTOR       | 0.536299509 | 1.82E-41  | postive |
| FLT1    | AL158206.1  | 0.526850886 | 7.93E-40  | postive |
| TYROBP  | PCED1B-AS1  | 0.723328932 | 2.04E-88  | postive |
| ITGB2   | PCED1B-AS1  | 0.674308161 | 9.89E-73  | postive |
| IL10RA  | PCED1B-AS1  | 0.818681212 | 1.82E-131 | postive |
| HLA-DMA | PCED1B-AS1  | 0.686623767 | 2.22E-76  | postive |
| TYMP    | PCED1B-AS1  | 0.604972766 | 4.13E-55  | postive |
| HCK     | PCED1B-AS1  | 0.604502202 | 5.26E-55  | postive |
| ISG20   | PCED1B-AS1  | 0.640811625 | 1.19E-63  | postive |
| CCL5    | PCED1B-AS1  | 0.855352412 | 1.66E-155 | postive |
| TAP1    | PCED1B-AS1  | 0.625646497 | 6.70E-60  | postive |
| CXCL9   | PCED1B-AS1  | 0.610462962 | 2.39E-56  | postive |
| GZMB    | PCED1B-AS1  | 0.554694558 | 8.17E-45  | postive |
| PTPRC   | PCED1B-AS1  | 0.623676067 | 1.99E-59  | postive |
| FCER1G  | PCED1B-AS1  | 0.771848621 | 1.08E-107 | postive |
| BPHL    | TMEM246-AS1 | 0.526202593 | 1.02E-39  | postive |
| FGF9    | AC148477.4  | 0.626775938 | 3.58E-60  | postive |
| DEFB1   | AC148477.4  | 0.68685065  | 1.90E-76  | postive |
| EGF     | AC148477.4  | 0.615255349 | 1.90E-57  | postive |
| BPHL    | AC007406.2  | 0.515145222 | 7.27E-38  | postive |
| VEGFA   | HIF1A-AS2   | 0.505335013 | 2.80E-36  | postive |
| FGF9    | AC055720.2  | 0.676763436 | 1.92E-73  | postive |
| DEFB1   | AC055720.2  | 0.540579851 | 3.15E-42  | postive |
| EGF     | AC055720.2  | 0.520802643 | 8.37E-39  | postive |
| VEGFA   | MIR210HG    | 0.53253073  | 8.31E-41  | postive |
| VEGFA   | AC009084.1  | 0.566663794 | 4.17E-47  | postive |
| FGF9    | AL606834.1  | 0.540407443 | 3.38E-42  | postive |
| BPHL    | U91328.1    | 0.584474111 | 1.07E-50  | postive |
| VEGFA   | LINC01011   | 0.520619403 | 8.98E-39  | postive |
| VEGFA   | AC090589.3  | 0.548938525 | 9.59E-44  | postive |
| FGF9    | AC103563.7  | 0.721660132 | 7.91E-88  | postive |
| DEFB1   | AC103563.7  | 0.764430941 | 1.91E-104 | postive |
| EGF     | AC103563.7  | 0.659924054 | 1.09E-68  | postive |
| ESRRG   | AC103563.7  | 0.508793474 | 7.84E-37  | postive |
| FGF9    | GAS6-DT     | 0.765216137 | 8.75E-105 | postive |
| DEFB1   | GAS6-DT     | 0.677166828 | 1.46E-73  | postive |
| EGF     | GAS6-DT     | 0.607369513 | 1.20E-55  | postive |
| GMFG    | AC011445.2  | 0.530957254 | 1.56E-40  | postive |



|        |              |             |           |         |
|--------|--------------|-------------|-----------|---------|
| S100A2 | AC011445.2   | 0.665272858 | 3.64E-70  | postive |
| VEGFA  | AC022150.2   | 0.532207947 | 9.45E-41  | postive |
| TYROBP | LINC01857    | 0.658031122 | 3.58E-68  | postive |
| CCL18  | LINC01857    | 0.514030268 | 1.11E-37  | postive |
| FCER1G | LINC01857    | 0.646355997 | 4.49E-65  | postive |
| BPHL   | LINC01507    | 0.599593713 | 6.39E-54  | postive |
| GMFG   | SNHG19       | 0.547160551 | 2.03E-43  | postive |
| S100A2 | SNHG19       | 0.701657801 | 4.36E-81  | postive |
| VEGFA  | AC007566.1   | 0.503019315 | 6.53E-36  | postive |
| INHBB  | AL355803.1   | 0.524946202 | 1.67E-39  | postive |
| FLT1   | AL355803.1   | 0.585184928 | 7.64E-51  | postive |
| DEFB1  | SPINT1-AS1   | 0.715536694 | 1.06E-85  | postive |
| IL10RA | TNRC6C-AS1   | 0.538168869 | 8.48E-42  | postive |
| FGF9   | AC021087.4   | 0.535923045 | 2.11E-41  | postive |
| DEFB1  | AC021087.4   | 0.574416459 | 1.22E-48  | postive |
| EGF    | AC021087.4   | 0.54774615  | 1.59E-43  | postive |
| GMFG   | ZSCAN16-AS1  | 0.553604754 | 1.31E-44  | postive |
| S100A2 | ZSCAN16-AS1  | 0.675930202 | 3.35E-73  | postive |
| FGF9   | LINC00265    | 0.614765671 | 2.46E-57  | postive |
| BPHL   | ADAMTS9-AS1  | 0.514013752 | 1.11E-37  | postive |
| FGF9   | COLCA1       | 0.52458234  | 1.93E-39  | postive |
| EGF    | COLCA1       | 0.535129968 | 2.92E-41  | postive |
| FGF9   | LINC00886    | 0.628156417 | 1.66E-60  | postive |
| DEFB1  | LINC00886    | 0.580709745 | 6.43E-50  | postive |
| EGF    | LINC00886    | 0.625609074 | 6.84E-60  | postive |
| ESRRG  | LINC00886    | 0.615440225 | 1.72E-57  | postive |
| FGF9   | SCAMP1-AS1   | 0.652265441 | 1.26E-66  | postive |
| DEFB1  | SCAMP1-AS1   | 0.568383288 | 1.92E-47  | postive |
| S100A2 | AL513165.1   | 0.648513609 | 1.23E-65  | postive |
| VEGFA  | AL160006.1   | 0.573317568 | 2.02E-48  | postive |
| DEFB1  | CA3-AS1      | 0.595211499 | 5.73E-53  | postive |
| TLR3   | WDFY3-AS2    | 0.515238598 | 7.01E-38  | postive |
| DEFB1  | SEMA3B-AS1   | 0.6336219   | 7.59E-62  | postive |
| BPHL   | EMX2OS       | 0.546258211 | 2.97E-43  | postive |
| IL10RA | HLA-DQB1-AS1 | 0.525487732 | 1.35E-39  | postive |
| VEGFA  | AL365330.1   | 0.573238823 | 2.09E-48  | postive |
| INHBB  | AC093278.2   | 0.51462083  | 8.86E-38  | postive |
| FLT1   | AC093278.2   | 0.768599698 | 2.96E-106 | postive |
| S100A2 | AC023509.3   | 0.551094959 | 3.83E-44  | postive |
| IL10RA | ITGB2-AS1    | 0.519872398 | 1.20E-38  | postive |
| TYMP   | ITGB2-AS1    | 0.550389879 | 5.18E-44  | postive |
| CCL5   | ITGB2-AS1    | 0.517529542 | 2.94E-38  | postive |
| FGF9   | SBF2-AS1     | 0.687603491 | 1.12E-76  | postive |
| DEFB1  | SBF2-AS1     | 0.509121082 | 6.95E-37  | postive |

|         |            |             |          |         |
|---------|------------|-------------|----------|---------|
| ESRRG   | SBF2-AS1   | 0.519789609 | 1.24E-38 | postive |
| VEGFA   | HCG27      | 0.52153829  | 6.30E-39 | postive |
| FGF9    | AC007637.1 | 0.539132407 | 5.71E-42 | postive |
| EGF     | AC007637.1 | 0.507267713 | 1.38E-36 | postive |
| VEGFA   | AL360181.2 | 0.505071747 | 3.09E-36 | postive |
| VEGFA   | AP001830.1 | 0.538093199 | 8.74E-42 | postive |
| FGF9    | FGD5-AS1   | 0.504150883 | 4.32E-36 | postive |
| DEFB1   | AP000894.4 | 0.511855892 | 2.51E-37 | postive |
| HSPA2   | AC130371.2 | 0.547951765 | 1.46E-43 | postive |
| S100A2  | AC130371.2 | 0.609463958 | 4.03E-56 | postive |
| VEGFA   | AL162586.1 | 0.500551602 | 1.60E-35 | postive |
| GMFG    | AC147067.1 | 0.589135248 | 1.13E-51 | postive |
| FGF9    | AL138756.1 | 0.654334658 | 3.54E-67 | postive |
| EGF     | AL138756.1 | 0.504048707 | 4.49E-36 | postive |
| TYMP    | U62317.2   | 0.617767659 | 4.94E-58 | postive |
| INHBB   | LINC00987  | 0.502059122 | 9.25E-36 | postive |
| FLT1    | LINC00987  | 0.565251815 | 7.86E-47 | postive |
| TLR3    | AP001372.2 | 0.515131681 | 7.30E-38 | postive |
| GMFG    | AP004609.3 | 0.557504909 | 2.41E-45 | postive |
| S100A2  | AP004609.3 | 0.642429867 | 4.61E-64 | postive |
| VEGFA   | AL139287.1 | 0.627538371 | 2.34E-60 | postive |
| VEGFA   | C1RL-AS1   | 0.508859824 | 7.65E-37 | postive |
| PSMB8   | PSMB8-AS1  | 0.665829856 | 2.54E-70 | postive |
| IL10RA  | PSMB8-AS1  | 0.558978996 | 1.27E-45 | postive |
| HLA-DMA | PSMB8-AS1  | 0.628829735 | 1.14E-60 | postive |
| CCL5    | PSMB8-AS1  | 0.619541114 | 1.90E-58 | postive |
| TAP1    | PSMB8-AS1  | 0.652391995 | 1.17E-66 | postive |
| VEGFA   | AL731533.2 | 0.500228852 | 1.79E-35 | postive |
| S100A2  | RTCA-AS1   | 0.567152295 | 3.35E-47 | postive |
| VEGFA   | TTC28-AS1  | 0.629134404 | 9.59E-61 | postive |
| VEGFA   | SNHG20     | 0.582489888 | 2.77E-50 | postive |
| FGF9    | PLBD1-AS1  | 0.615219095 | 1.93E-57 | postive |
| EGF     | PLBD1-AS1  | 0.579345617 | 1.22E-49 | postive |
| FGF9    | AC009779.2 | 0.564402642 | 1.15E-46 | postive |
| DEFB1   | AC009779.2 | 0.547182467 | 2.01E-43 | postive |
| EGF     | AC009779.2 | 0.620704268 | 1.01E-58 | postive |
| FGF9    | AL031123.1 | 0.611005088 | 1.80E-56 | postive |
| FGF9    | PRDM16-DT  | 0.67362746  | 1.56E-72 | postive |
| DEFB1   | PRDM16-DT  | 0.752177396 | 2.44E-99 | postive |
| EGF     | PRDM16-DT  | 0.62570891  | 6.47E-60 | postive |
| ESRRG   | PRDM16-DT  | 0.528922153 | 3.50E-40 | postive |
| ITGB2   | AC090559.1 | 0.629052876 | 1.00E-60 | postive |
| IL10RA  | AC090559.1 | 0.684320025 | 1.11E-75 | postive |
| HCK     | AC090559.1 | 0.668688167 | 4.00E-71 | postive |

|         |            |             |          |         |
|---------|------------|-------------|----------|---------|
| PTPRC   | AC090559.1 | 0.643463516 | 2.50E-64 | postive |
| TYROBP  | USP30-AS1  | 0.612128416 | 9.96E-57 | postive |
| ITGB2   | USP30-AS1  | 0.588974548 | 1.23E-51 | postive |
| PSMB8   | USP30-AS1  | 0.627960273 | 1.85E-60 | postive |
| IL10RA  | USP30-AS1  | 0.66779314  | 7.15E-71 | postive |
| HLA-DMA | USP30-AS1  | 0.681597824 | 7.21E-75 | postive |
| TYMP    | USP30-AS1  | 0.659499939 | 1.43E-68 | postive |
| HCK     | USP30-AS1  | 0.514071449 | 1.09E-37 | postive |
| ISG20   | USP30-AS1  | 0.522992694 | 3.58E-39 | postive |
| CCL5    | USP30-AS1  | 0.742417985 | 1.76E-95 | postive |
| TAP1    | USP30-AS1  | 0.712863273 | 8.60E-85 | postive |
| CXCL9   | USP30-AS1  | 0.596951374 | 2.41E-53 | postive |
| PTPRC   | USP30-AS1  | 0.548063875 | 1.39E-43 | postive |
| FCER1G  | USP30-AS1  | 0.629577718 | 7.48E-61 | postive |
| GMFG    | AC012510.1 | 0.547299417 | 1.92E-43 | postive |
| S100A2  | RPARP-AS1  | 0.602234846 | 1.68E-54 | postive |
| VEGFA   | AC004148.2 | 0.534069851 | 4.47E-41 | postive |
| GMFG    | PCAT19     | 0.619742276 | 1.70E-58 | postive |
| VEGFA   | AC060780.1 | 0.528200104 | 4.66E-40 | postive |
| S100A2  | AC090425.1 | 0.545028939 | 4.97E-43 | postive |
| FGF9    | AP000757.1 | 0.660319161 | 8.51E-69 | postive |
| DEFB1   | AP000757.1 | 0.712093985 | 1.56E-84 | postive |
| EGF     | AP000757.1 | 0.586265015 | 4.55E-51 | postive |
| INHBB   | AC007998.3 | 0.568045914 | 2.24E-47 | postive |
| S100A2  | AC087379.2 | 0.531569567 | 1.22E-40 | postive |
| VEGFA   | AL354733.3 | 0.544926467 | 5.19E-43 | postive |
| FGF9    | AL035661.1 | 0.538351691 | 7.87E-42 | postive |
| DEFB1   | AL035661.1 | 0.750444701 | 1.22E-98 | postive |
| EGF     | AL035661.1 | 0.650108979 | 4.69E-66 | postive |
| VEGFA   | AC136475.2 | 0.548721438 | 1.05E-43 | postive |
| VEGFA   | AC110285.2 | 0.513294947 | 1.46E-37 | postive |
| VEGFA   | PTOV1-AS2  | 0.513109752 | 1.57E-37 | postive |
| VEGFA   | AC011472.1 | 0.59138615  | 3.78E-52 | postive |
| TYROBP  | LINC01094  | 0.524348495 | 2.11E-39 | postive |
| ITGB2   | LINC01094  | 0.6225054   | 3.77E-59 | postive |
| IL10RA  | LINC01094  | 0.502512016 | 7.85E-36 | postive |
| HCK     | LINC01094  | 0.694963453 | 5.92E-79 | postive |
| PTPRC   | LINC01094  | 0.609259399 | 4.49E-56 | postive |
| FCER1G  | LINC01094  | 0.631075013 | 3.22E-61 | postive |
| ITGB2   | AL161785.1 | 0.522015494 | 5.24E-39 | postive |
| IL10RA  | AL161785.1 | 0.561708978 | 3.81E-46 | postive |
| HCK     | AL161785.1 | 0.533248678 | 6.23E-41 | postive |
| FGF9    | MAP4K3-DT  | 0.551886054 | 2.73E-44 | postive |
| ITGB2   | AC145098.1 | 0.603356094 | 9.46E-55 | postive |

|        |                           |             |           |         |
|--------|---------------------------|-------------|-----------|---------|
| IL10RA | AC145098.1                | 0.661435515 | 4.21E-69  | postive |
| HCK    | AC145098.1                | 0.619635202 | 1.80E-58  | postive |
| PTPRC  | AC145098.1                | 0.508314489 | 9.36E-37  | postive |
| FCER1G | AC145098.1                | 0.56411292  | 1.31E-46  | postive |
| VEGFA  | AL022328.2                | 0.580183023 | 8.24E-50  | postive |
| FGF9   | NNT-AS1                   | 0.539178547 | 5.61E-42  | postive |
| DEFB1  | NNT-AS1                   | 0.512531444 | 1.95E-37  | postive |
| EGF    | NNT-AS1                   | 0.532941028 | 7.05E-41  | postive |
| ESRRG  | NNT-AS1                   | 0.537305935 | 1.21E-41  | postive |
| VEGFA  | ARHGAP27P1-BPTFP1-KPNA2P3 | 0.509682535 | 5.64E-37  | postive |
| FGF9   | OLMALINC                  | 0.615548876 | 1.62E-57  | postive |
| DEFB1  | OLMALINC                  | 0.595127887 | 5.97E-53  | postive |
| S100A2 | ENTPD3-AS1                | 0.570689947 | 6.73E-48  | postive |
| GMFG   | LINC01023                 | 0.537117465 | 1.30E-41  | postive |
| S100A2 | LINC01023                 | 0.678368208 | 6.49E-74  | postive |
| VEGFA  | AP000355.1                | 0.531521775 | 1.24E-40  | postive |
| FGF9   | AL031710.1                | 0.55633222  | 4.02E-45  | postive |
| DEFB1  | AL031710.1                | 0.874983578 | 2.69E-171 | postive |
| EGF    | AL031710.1                | 0.580082056 | 8.65E-50  | postive |
| FLT1   | AC096921.2                | 0.625505868 | 7.24E-60  | postive |
| VEGFA  | AC005104.1                | 0.505167753 | 2.98E-36  | postive |
| C3     | LINC01426                 | 0.512584997 | 1.91E-37  | postive |
| PSMB8  | AC242842.1                | 0.511881996 | 2.48E-37  | postive |
| VEGFA  | RUSC1-AS1                 | 0.519614488 | 1.32E-38  | postive |
| VEGFA  | LENG8-AS1                 | 0.535761725 | 2.26E-41  | postive |
| IL10RA | AL133371.2                | 0.530405631 | 1.94E-40  | postive |
| HCK    | AL133371.2                | 0.503888165 | 4.76E-36  | postive |
| PTPRC  | AL133371.2                | 0.560859052 | 5.54E-46  | postive |
| S100A2 | AP001505.1                | 0.52558702  | 1.30E-39  | postive |
| TLR3   | AC098484.1                | 0.501054353 | 1.33E-35  | postive |
| VEGFA  | AL512791.1                | 0.507614971 | 1.21E-36  | postive |
| IL10RA | NCK1-DT                   | 0.540202759 | 3.68E-42  | postive |
| PTPRC  | NCK1-DT                   | 0.574605466 | 1.11E-48  | postive |
| VEGFA  | AC018730.1                | 0.558381928 | 1.64E-45  | postive |
| VEGFA  | AC097534.2                | 0.531877489 | 1.08E-40  | postive |
| FGF9   | ZNF710-AS1                | 0.520398564 | 9.78E-39  | postive |
| EGF    | ZNF710-AS1                | 0.616498357 | 9.76E-58  | postive |
| ESRRG  | ZNF710-AS1                | 0.560769058 | 5.76E-46  | postive |
| VEGFA  | AC078864.1                | 0.519744535 | 1.26E-38  | postive |
| S100A2 | AC244090.1                | 0.657849056 | 4.01E-68  | postive |

### Supplementary Table 3

The 29 immune signatures represented by 29 different gene sets.

|                               |                                                                                                                                                                                                                                                                                                                                                                                                                                                                                                                                                                                                                                                                                                                                                                                                                                                                                                             |
|-------------------------------|-------------------------------------------------------------------------------------------------------------------------------------------------------------------------------------------------------------------------------------------------------------------------------------------------------------------------------------------------------------------------------------------------------------------------------------------------------------------------------------------------------------------------------------------------------------------------------------------------------------------------------------------------------------------------------------------------------------------------------------------------------------------------------------------------------------------------------------------------------------------------------------------------------------|
| <b>aDCs</b>                   | CD83, LAMP3, CCL1                                                                                                                                                                                                                                                                                                                                                                                                                                                                                                                                                                                                                                                                                                                                                                                                                                                                                           |
| <b>APC co inhibition</b>      | C10orf54, CD274, LGALS9, PDCD1LG2, PVRL3                                                                                                                                                                                                                                                                                                                                                                                                                                                                                                                                                                                                                                                                                                                                                                                                                                                                    |
| <b>APC co stimulation</b>     | CD40, CD58, CD70, ICOSLG, SLAMF1, TNFSF14, TNFSF15, TNFSF18, TNFSF4, TNFSF8, TNFSF9                                                                                                                                                                                                                                                                                                                                                                                                                                                                                                                                                                                                                                                                                                                                                                                                                         |
| <b>B cells</b>                | BACH2, BANK1, BLK, BTLA, CD79A, CD79B, FCRL1, FCRL3, HVCN1, RALGPS2                                                                                                                                                                                                                                                                                                                                                                                                                                                                                                                                                                                                                                                                                                                                                                                                                                         |
| <b>CCR</b>                    | CCL16, TPO, TGFB2, CXCL2, CCL14, TGFB3, IL11RA, CCL11, IL4I1, IL33, CXCL12, CXCL10, BMPER, BMP8A, CXCL11, IL21R, IL17B, TNFRSF9, ILF2, CX3CR1, CCR8, TNFSF12, CSF3, TNFSF4, BMP3, CX3CL1, BMP5, CXCR2, TNFRSF10D, BMP2, CXCL14, CCL28, CXCL3, BMP6, CCL21, CXCL9, CCL23, IL6, TNFRSF18, IL17RD, IL17D, IL27, CCL7, IL1R1, CXCR4, CXCR2P1, TGFB1I1, IFNGR1, IL9R, IL1RAPL1, IL11, CSF1, IL20RA, IL25, TNFRSF4, IL18, ILF3, CCL20, TNFRSF12A, IL6ST, CXCL13, IL12B, TNFRSF8, IL6R, BMPR2, IFNE, IL1RAPL2, IL3RA, BMP4, CCL24, TNFSF13B, CCR4, IL2RA, IL32, TNFRSF10C, IL22RA1, BMPR1A, CXCR5, CXCR3, IFNA8, IL17REL, IFNB1, IFNAR1, TNFRSF1B, CCL17, IFNL1, IL16, IL1RL1, ILK, CCL25, ILDR2, CXCR1, IL36RN, IL34, TGFB1, IFNG, IL19, ILKAP, BMP2K, CCR10, ILDR1, EPO, CCR7, IL17C, IL23A, CCR5, IL7, EPOR, CCL13, IL2RG, IL31RA, TNFAIP6, IFNL2, BMP1, IL12RB1, TNFAIP8, IL4R, TNFRSF6B, TNFAIP8L1, TNFRSF10B |
| <b>CD8+ T cells</b>           | CD8A                                                                                                                                                                                                                                                                                                                                                                                                                                                                                                                                                                                                                                                                                                                                                                                                                                                                                                        |
| <b>Check-point</b>            | <i>IDO1, LAG3, CTLA4, TNFRSF9, ICOS, CD80, PDCD1LG2, TIGIT, CD70, TNFSF9, ICOSLG, KIR3DL1, CD86, PDCD1, LAIR1, TNFRSF8, TNFSF15, TNFRSF14, IDO2, CD276, CD40, TNFRSF4, TNFSF14, HHLA2, CD244, CD274, HAVCR2, CD27, BTLA, LGALS9, TMIGD2, CD28, CD48, TNFRSF25, CD40LG, ADORA2A, VTCN1, CD160, CD44, TNFSF18, TNFRSF18, BTNL2, C10orf54, CD200R1, TNFSF4, CD200, NRPI</i>                                                                                                                                                                                                                                                                                                                                                                                                                                                                                                                                    |
| <b>Cytolytic activity</b>     | <i>PRF1, GZMA</i>                                                                                                                                                                                                                                                                                                                                                                                                                                                                                                                                                                                                                                                                                                                                                                                                                                                                                           |
| <b>DCs</b>                    | <i>CCL17, CCL22, CD209, CCL13</i>                                                                                                                                                                                                                                                                                                                                                                                                                                                                                                                                                                                                                                                                                                                                                                                                                                                                           |
| <b>HLA</b>                    | <i>HLA-E, HLA-DPB2, HLA-C, HLA-J, HLA-DQB1, HLA-DQB2, HLA-DQA2, HLA-DQAI, HLA-A, HLA-DMA, HLA-DOB, HLA-DRB1, HLA-H, HLA-B, HLA-DRB5, HLA-DOA, HLA-DPB1, HLA-DRA, HLA-DRB6, HLA-L, HLA-F, HLA-G, HLA-DMB, HLA-DPA1</i>                                                                                                                                                                                                                                                                                                                                                                                                                                                                                                                                                                                                                                                                                       |
| <b>Inflammation-promoting</b> | <i>CCL5, CD19, CD8B, CXCL10, CXCL13, CXCL9, GNLV, GZMB, IFNG, IL12A, IL12B, IRF1, PRF1, STAT1, TBX21</i>                                                                                                                                                                                                                                                                                                                                                                                                                                                                                                                                                                                                                                                                                                                                                                                                    |
| <b>Macrophages</b>            | <i>C11orf45, CD68, CLEC5A, CYBB, FUCA1, GPNMB, HS3ST2, LGMN, MMP9, TM4SF19</i>                                                                                                                                                                                                                                                                                                                                                                                                                                                                                                                                                                                                                                                                                                                                                                                                                              |
| <b>MHC class I</b>            | <i>B2M, HLA-A, TAP1</i>                                                                                                                                                                                                                                                                                                                                                                                                                                                                                                                                                                                                                                                                                                                                                                                                                                                                                     |
| <b>Neutrophils</b>            | <i>EVI2B, HSD17B11, KDM6B, MEGF9, MNDA, NLRP12, PADI4, SELL, TRANK1, VNN3</i>                                                                                                                                                                                                                                                                                                                                                                                                                                                                                                                                                                                                                                                                                                                                                                                                                               |
| <b>NK cells</b>               | <i>KLRC1, KLRF1</i>                                                                                                                                                                                                                                                                                                                                                                                                                                                                                                                                                                                                                                                                                                                                                                                                                                                                                         |
| <b>Parainflammation</b>       | <i>CXCL10, PLAT, CCND1, LGMN, PLAUR, AIM2, MMP7, ICAM1, MX2, CXCL9, ANXA1, TLR2, PLA2G2D, ITGA2, MX1, HMOX1, CD276, TIRAP, IL33, PTGES, TNFRSF12A, SCARB1, CD14, BLNK, IFIT3, RETNLB, IFIT2, ISG15, OAS2, REL, OAS3, CD44, PPARG, BST2, OAS1, NOX1, PLA2G2A, IFIT1, IFITM3, ILIRN</i>                                                                                                                                                                                                                                                                                                                                                                                                                                                                                                                                                                                                                       |
| <b>pDCs</b>                   | <i>CLEC4C, CXCR3, GZMB, IL3RA, IRF7, IRF8, LILRA4, PHEX, PLD4, PTCRA</i>                                                                                                                                                                                                                                                                                                                                                                                                                                                                                                                                                                                                                                                                                                                                                                                                                                    |

---

|                              |                                                                                                                                                                                                                                                                                                                                                                                                                                                                                                                                                                                                                                                                                                                                                                                                                                                          |
|------------------------------|----------------------------------------------------------------------------------------------------------------------------------------------------------------------------------------------------------------------------------------------------------------------------------------------------------------------------------------------------------------------------------------------------------------------------------------------------------------------------------------------------------------------------------------------------------------------------------------------------------------------------------------------------------------------------------------------------------------------------------------------------------------------------------------------------------------------------------------------------------|
| <b>T cell co-inhibition</b>  | <i>BTLA, C10orf54, CD160, CD244, CD274, CTLA4, HAVCR2, LAG3, LAIR1, TIGIT</i>                                                                                                                                                                                                                                                                                                                                                                                                                                                                                                                                                                                                                                                                                                                                                                            |
| <b>T cell co-stimulation</b> | CD2, CD226, CD27, CD28, CD40LG, ICOS, SLAMF1, TNFRSF18, TNFRSF25, TNFRSF4, TNFRSF8, TNFRSF9, TNFSF14                                                                                                                                                                                                                                                                                                                                                                                                                                                                                                                                                                                                                                                                                                                                                     |
| <b>T helper cells</b>        | CD4                                                                                                                                                                                                                                                                                                                                                                                                                                                                                                                                                                                                                                                                                                                                                                                                                                                      |
| <b>Tfh</b>                   | PDCD1                                                                                                                                                                                                                                                                                                                                                                                                                                                                                                                                                                                                                                                                                                                                                                                                                                                    |
| <b>Th1 cells</b>             | IFNG, TBX21, CTLA4, STAT4, CD38, IL12RB2, LTA, CSF2                                                                                                                                                                                                                                                                                                                                                                                                                                                                                                                                                                                                                                                                                                                                                                                                      |
| <b>Th2 cells</b>             | PMCH, LAIR2, SMAD2, CXCR6, GATA3, IL26                                                                                                                                                                                                                                                                                                                                                                                                                                                                                                                                                                                                                                                                                                                                                                                                                   |
| <b>TIL</b>                   | ITM2C, CD38, THEMIS2, GLYR1, ICOS, F5, TIGIT, KLRD1, IRF4, PRKCQ, FCRL5, SIRPG, LPXN, IL2RG, CCL5, LCK, TRAF3IP3, CD86, MAL, LILRB1, DOK2, CD6, PAG1, LAX1, PLEK, PIK3CD, SLAMF1, XCL1, GPR171, XCL2, TBX21, CD2, CD53, KLHL6, SLAMF6, CD40, SIT1, TNFRSF4, CD79A, CD247, LCP2, CD3D, CD27, SH2D1A, FYB, ARHGAP30, ACAP1, CST7, CD3G, IL2RB, CD3E, FCRL3, CORO1A, ITK, TCL1A, CYBB, CSF2RB, IKZF1, NCF4, DOCK2, CCR2, PTPRC, PLAC8, NCKAP1L, IL7R, 6-Sep, CD28, STAT4, CD8A, LY9, CD48, HCST, PTPRCAP, SASH3, ARHGAP25, LAT, TRAT1, IL10RA, PAX5, CCR7, DOCK11, PARVG, SPNS1, CD52, HCLS1, ARHGAP9, GIMAP6, PRKCB, MS4A1, GPR18, TBC1D10C, GVINP1, P2RY8, EVI2B, VAMP5, KLRK1, SELL, MPEG1, MS4A6A, ARHGAP15, MFNG, GZMK, SELPLG, TARP, GIMAP7, FAM65B, INPP5D, ITGA4, MZB1, GPSM3, STK10, CLEC2D, IL16, NLRC3, GIMAP5, GIMAP4, IFFO1, CFH, PVRIG, CFHR1 |
| <b>Treg</b>                  | IL12RB2, TMPRSS6, CTSC, LAPTM4B, TFRC, RNF145, NETO2, ADAT2, CHST2, CTLA4, NFE2L3, LIMA1, IL1R2, ICOS, HSDL2, HTATIP2, FKBP1A, TIGIT, CCR8, LTA, SLC35F2, IL21R, AHCYL1, SOCS2, ETV7, BCL2L1, RRAGB, ACSL4, CHRNA6, BATF, LAX1, ADPRH, TNFRSF4, ANKRD10, CD274, CASP1, LY75, NPTN, SSTR3, GRSF1, CSF2RB, TMEM184C, NDFIP2, ZBTB38, ERI1, TRAF3, NAB1, HS3ST3B1, LAYN, JAK1, VDR, LEPROT, GCNT1, PTPRJ, IKZF2, CSF1, ENTPD1, TNFRSF18, METTL7A, KSR1, SSH1, CADM1, IL1R1, ACP5, CHST7, THADA, CD177, NFAT5, ZNF282, MAGEH1                                                                                                                                                                                                                                                                                                                                |
| <b>Type I IFN Reponse</b>    | DDX4, IFIT1, IFIT2, IFIT3, IRF7, ISG20, MX1, MX2, RSAD2, TNFSF10                                                                                                                                                                                                                                                                                                                                                                                                                                                                                                                                                                                                                                                                                                                                                                                         |
| <b>Type II IFN Reponse</b>   | GPR146, SELP, AHR                                                                                                                                                                                                                                                                                                                                                                                                                                                                                                                                                                                                                                                                                                                                                                                                                                        |
| <b>iDCs</b>                  | CD1A, CD1E                                                                                                                                                                                                                                                                                                                                                                                                                                                                                                                                                                                                                                                                                                                                                                                                                                               |
| <b>Mast cells</b>            | CMA1, MS4A2, TPSAB1                                                                                                                                                                                                                                                                                                                                                                                                                                                                                                                                                                                                                                                                                                                                                                                                                                      |

---
